# Supplementary material for: Pre-lithiation carbon anodes mitigating potassium loss for high-performance potassium-ion energy storage devices
Source: Royal Society of Chemistry journal article supplement (doi:10.1039/d4ta06451h), 2024-01-01
Supplement: d4ta06451h1.pdf [file d4ta06451h1.pdf]

Supporting Information for *Journal of Materials Chemistry A*

**Pre-lithiation carbon anodes mitigating potassium loss toward for high-performance potassium-ion energy storage devices**

Danni Du,<sup>a</sup> Qingyuan Liu,<sup>a\*</sup> Jing Gao,<sup>a</sup> Yuying Qin,<sup>a</sup> Xiaobo Jiang,<sup>a</sup> Yuanchang Shi,<sup>a\*</sup> Minghao Hua,<sup>a\*</sup> Xiaohang Lin,<sup>a\*</sup> Zhiwei Zhang,<sup>a</sup> Chengxiang Wang,<sup>a</sup> Longwei Yin,<sup>a</sup> Rutao Wang<sup>a,b\*</sup>

<sup>a</sup>Key Laboratory for Liquid-Solid Structural Evolution and Processing of Materials, Ministry of Education, School of Materials Science and Engineering, Shandong University, Ji'nan 250061, China

<sup>b</sup>Key Laboratory of Advanced Energy Materials Chemistry (Ministry of Education), Nankai University, Tianjin 300071, China

\*Email: [rtwang@sdu.edu.cn](mailto:rtwang@sdu.edu.cn); [202014124@mail.sdu.edu.cn](mailto:202014124@mail.sdu.edu.cn); [yuanchangshi@sdu.edu.cn](mailto:yuanchangshi@sdu.edu.cn); [huaminghao@mail.sdu.edu.cn](mailto:huaminghao@mail.sdu.edu.cn); [lxh12345@sdu.edu.cn](mailto:lxh12345@sdu.edu.cn);

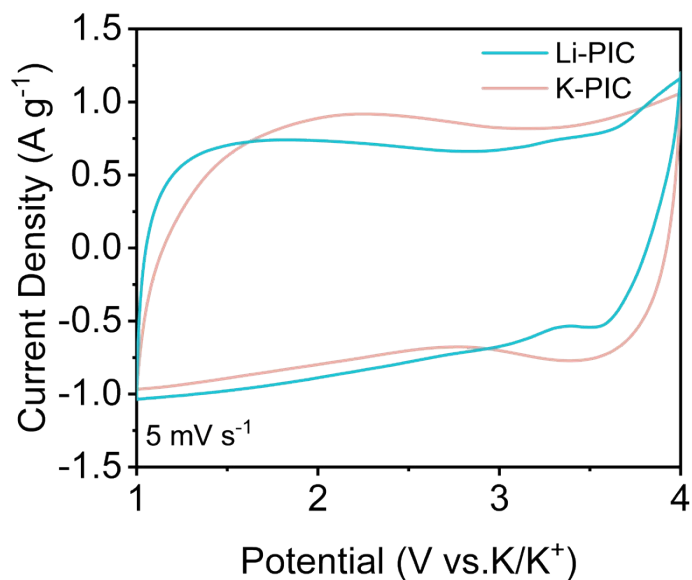

**Fig. S1** A comparison of CV curves of Li-PIC and K-PIC at a scan rate of  $5 \text{ mV s}^{-1}$ .

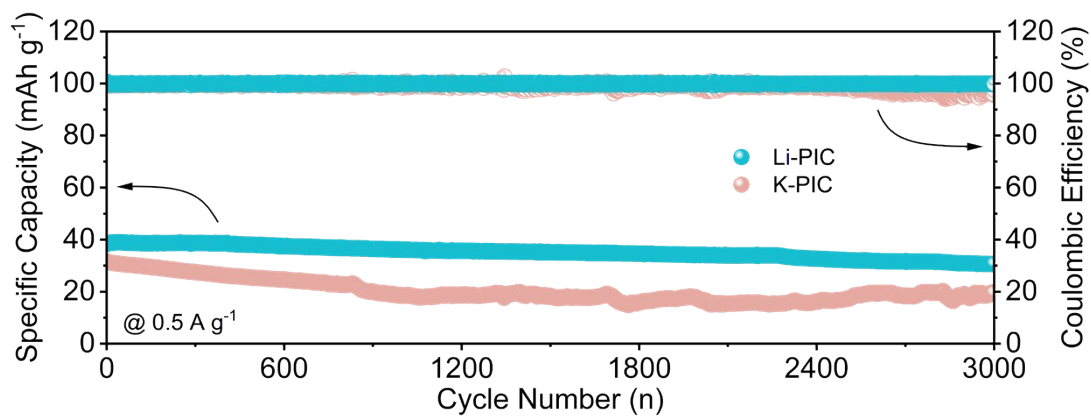

**Fig. S2** The comparison of long-term cycling performance and corresponding coulombic efficiencies for 3000 cycles of at  $0.5 \text{ A g}^{-1}$  for Li-PIC and K-PIC.

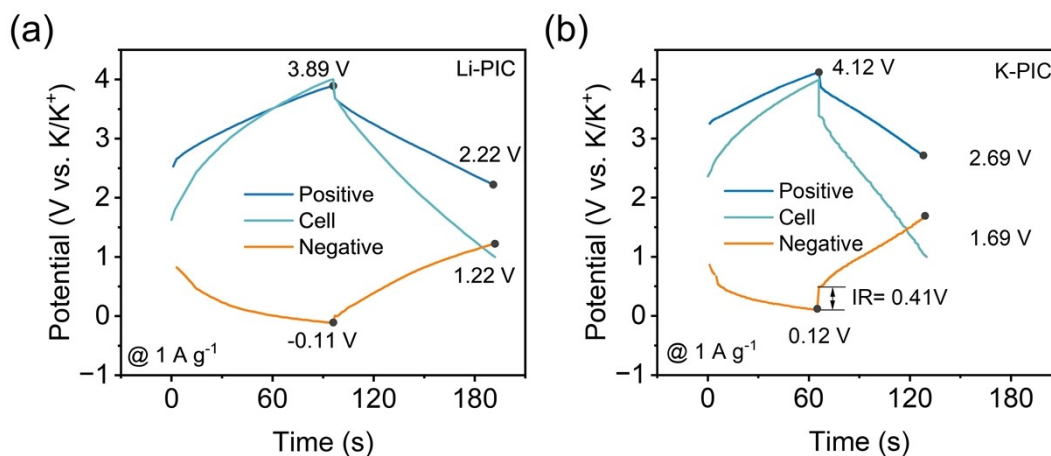

**Fig. S3** In situ monitoring of the SC//PC PIC during the GCD test using the Swagelok three-electrode system with reference electrode of metal K at  $1 \text{ A g}^{-1}$ , (a) Li-PIC, (b) K-PIC.

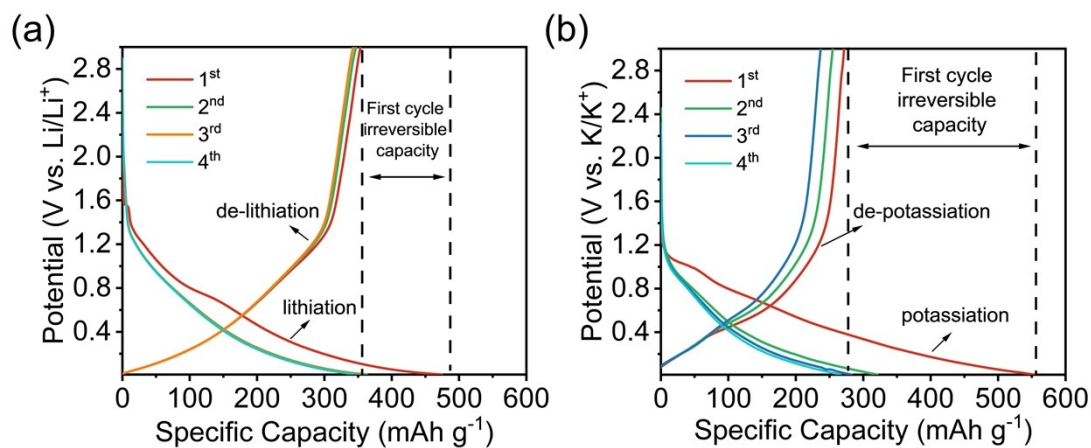

**Fig. S4** The charge/discharge profiles of (a) the pre-lithiation process and (b) pre-potassiation process at  $0.1 \text{ A g}^{-1}$ .

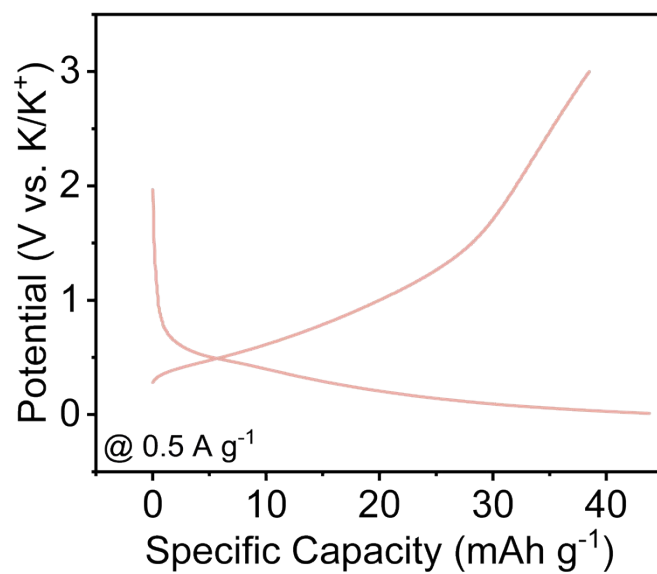

**Fig. S5** The charge/discharge profiles at  $0.5 \text{ A g}^{-1}$  of K-PIB.

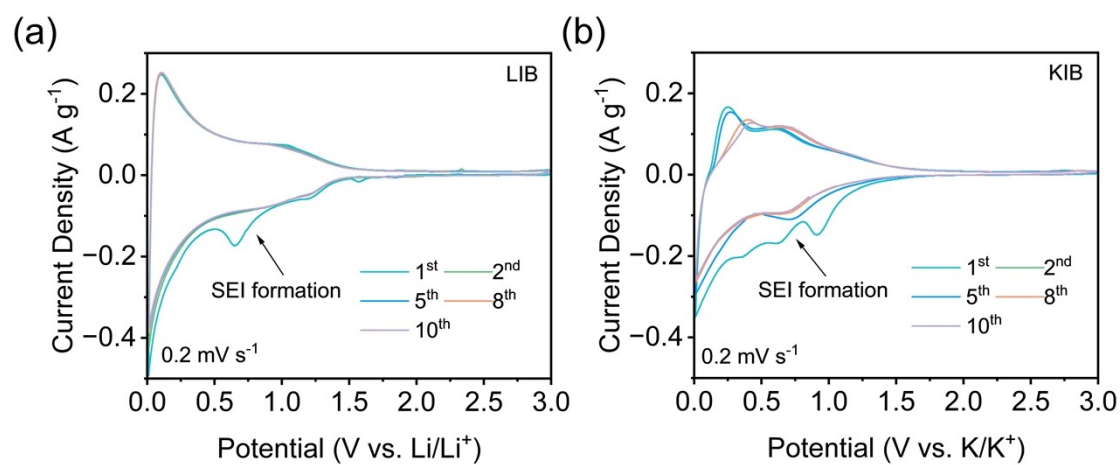

**Fig. S6** A comparison of CV curves at a scan rate of  $0.2 \text{ mV s}^{-1}$  (a) LIB and (b) KIB.

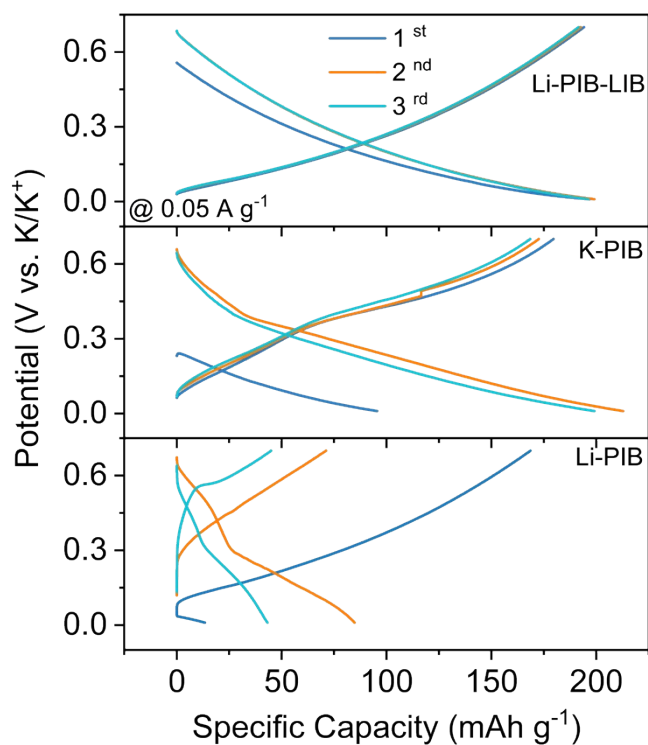

**Fig. S7** The charge/discharge profiles of the first three cycles at  $0.05 \text{ A g}^{-1}$  for Li-PIB (bottom), K-PIB (middle) and Li-PIB-LIB (top).

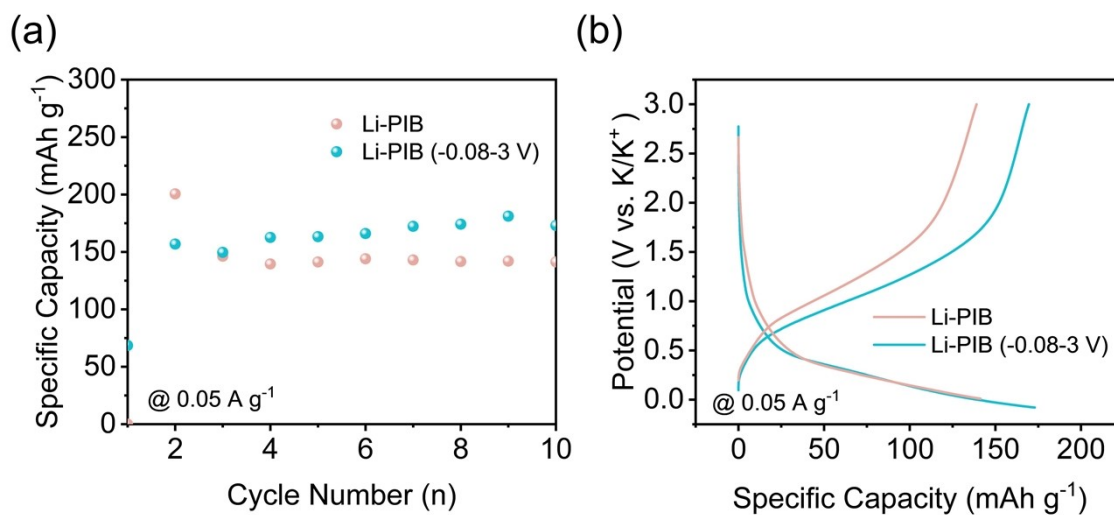

**Fig. S8** (a) The capacity comparison of LIB within an extended potential range from  $-0.08$  to  $3.0 \text{ V}$  at  $0.05 \text{ A g}^{-1}$ . (b) The corresponding charge/discharge profiles.

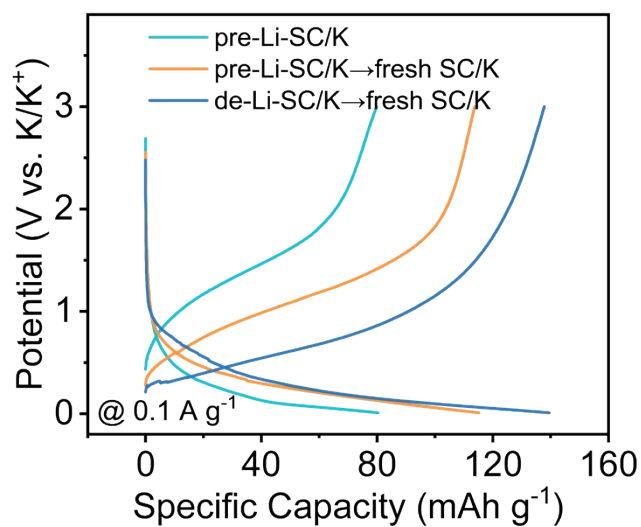

**Fig. S9** The capacity comparison of pre-Li-SC/K half-cells treated under different conditions at  $0.1 \text{ A g}^{-1}$ .

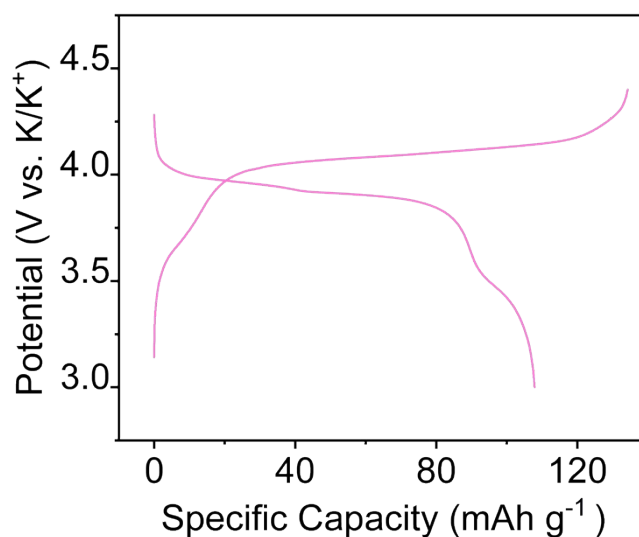

**Fig. S10** Charge/discharge curves of assembled PB half-cell in the voltage range of 3-4.4 V at a current density of  $0.05 \text{ A g}^{-1}$ .

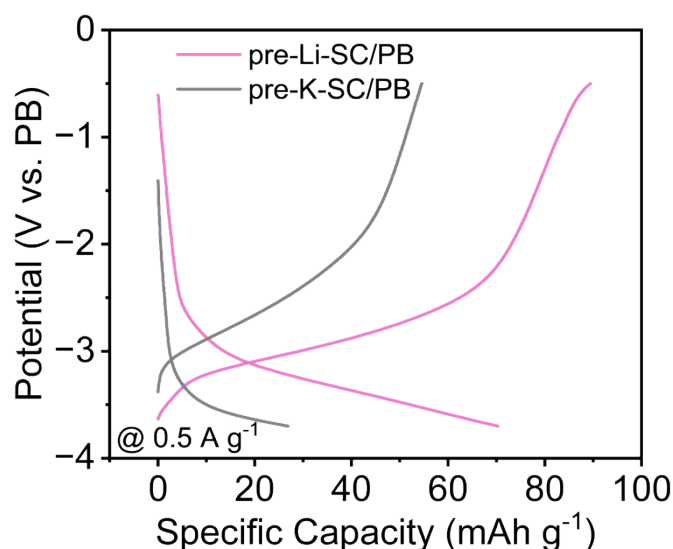

**Fig. S11** The charge/discharge profiles at  $0.5 \text{ A g}^{-1}$  of pre-Li-SC/PB and pre-K-SC/PB.

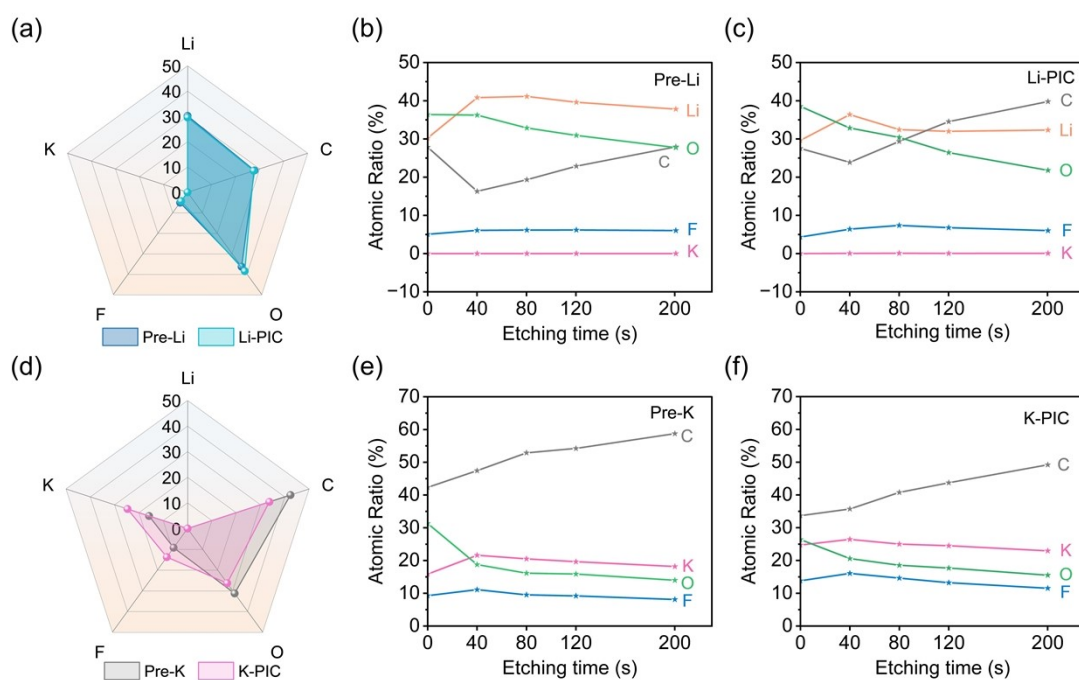

**Fig. S12** (a) The elemental concentrations of the SEI on the surfaces of Pre-Li and Li-PIC. Atomic compositions of Li, O, C, F and K collected at different depths on prelithiated SC (b) Pre-Li and (c) Li-PIC. (d) Comparison of the elemental concentrations of the SEI on the surfaces of prepotassiated of Pre-K and K-PIC. Atomic compositions of O, C, F and K collected at different depths on prepotassiated SC anode (e) Pre-K and (f) K-PIC.

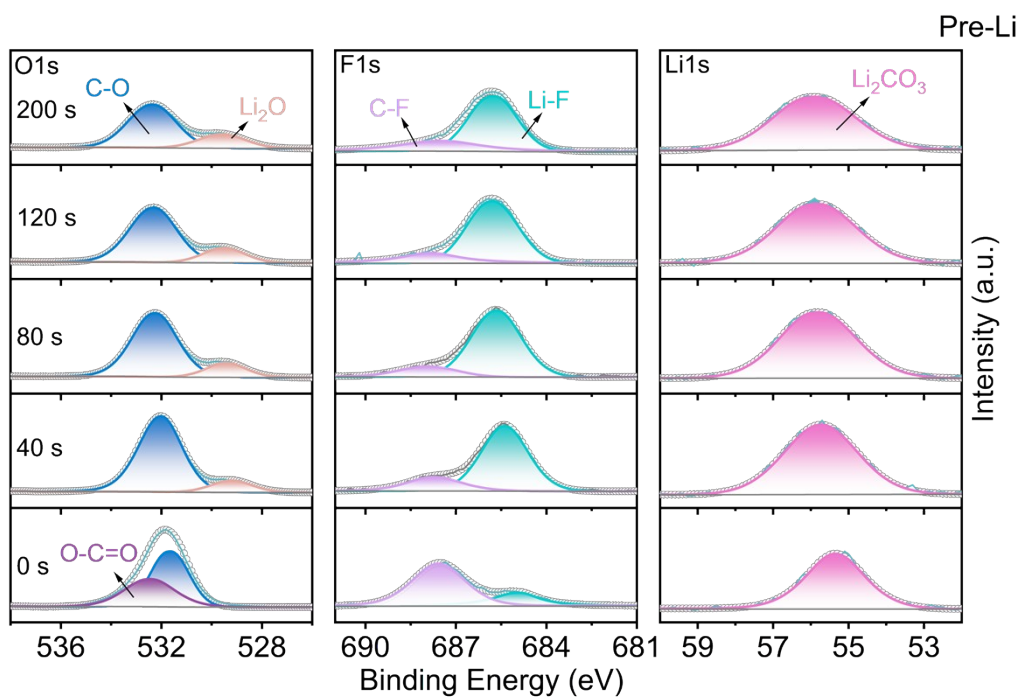

**Fig. S13** XPS spectra with O 1s, F 1s and Li 1s sputtered at 0 s, 40 s, 80 s, 120 s and 200 s for Pre-Li.

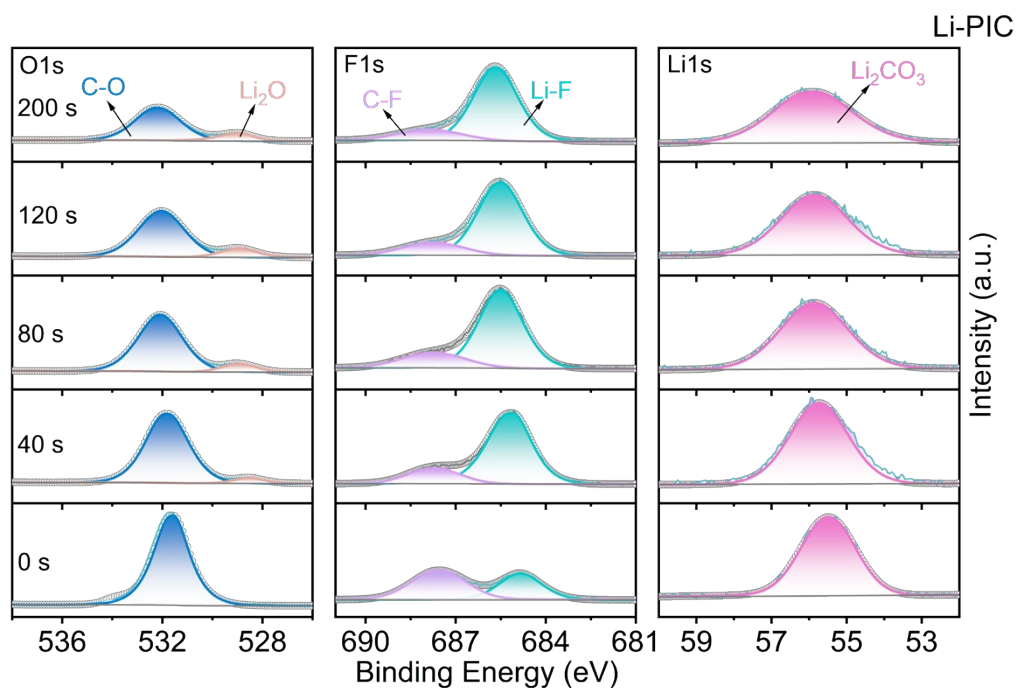

**Fig. S14** XPS spectra with C 1s, O 1s, F 1s and Li 1s sputtered at 0 s, 40 s, 80 s, 120 s and 200 s for Li-PIC.



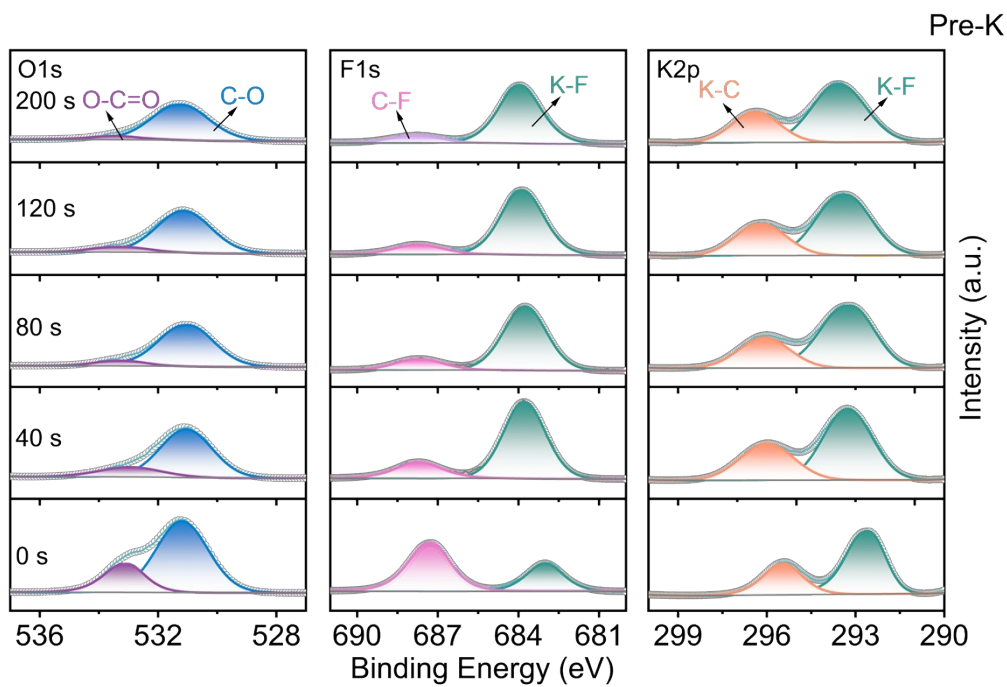

**Fig. S15** XPS spectra with O 1s, F 1s and Li 1s sputtered at 0 s, 40 s, 80 s, 120 s and 200 s for Pre-K.

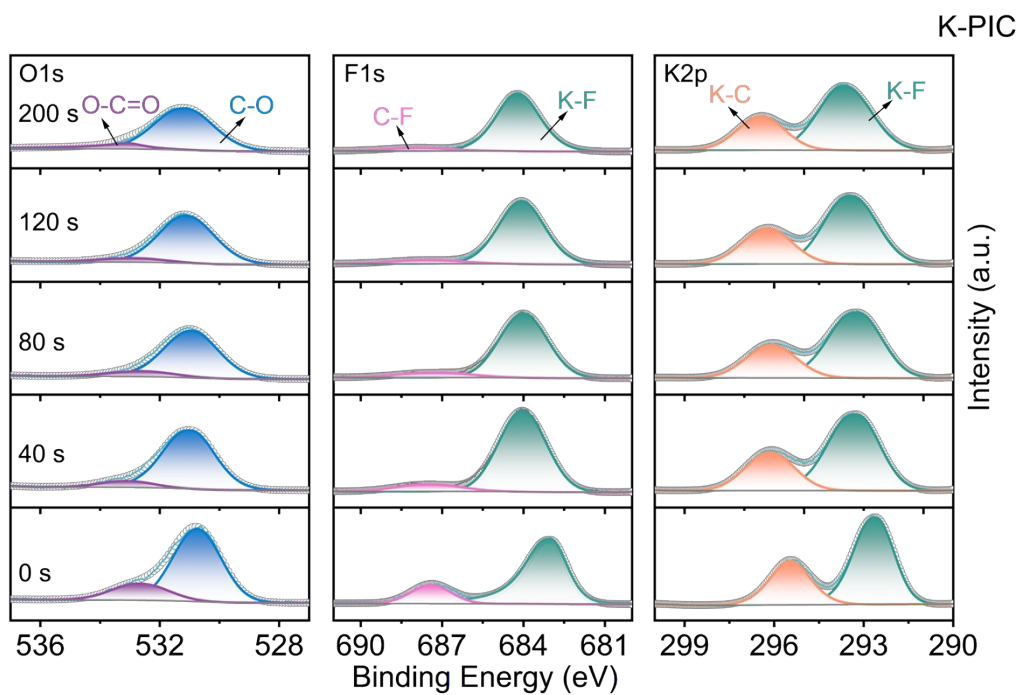

**Fig. S16** XPS spectra with O 1s, F 1s and Li 1s sputtered at 0 s, 40 s, 80 s, 120 s and 200 s for K-PIC electrode.

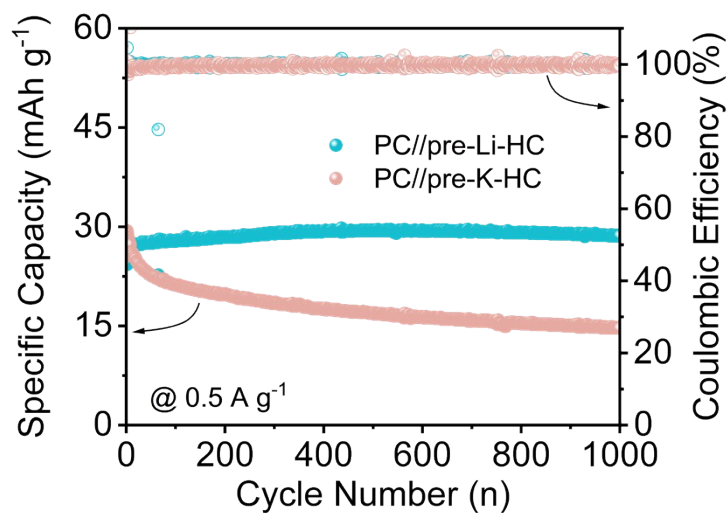

**Fig. S17** The comparison of long-term cycling performance and corresponding coulombic efficiencies for 1000 cycles of at  $0.5 \text{ A g}^{-1}$  for PC//pre-Li-HC and PC//pre-K-HC PICs.

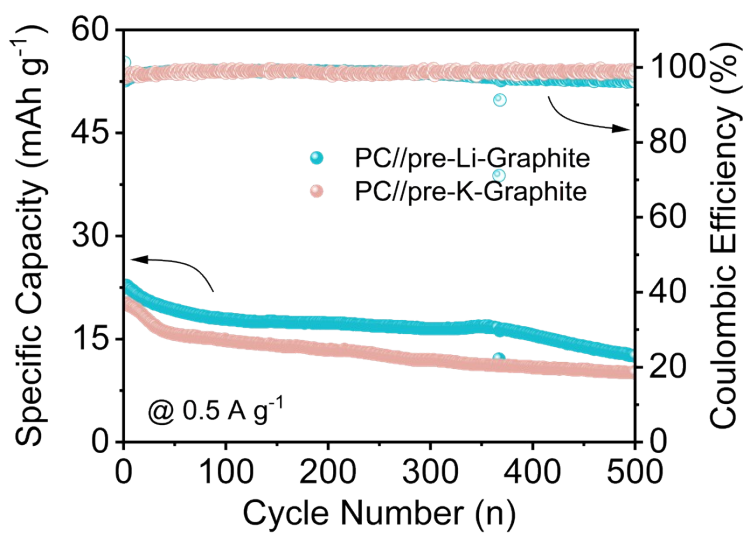

**Fig. S18** The comparison of long-term cycling performance and corresponding coulombic efficiencies for 500 cycles of at  $0.5 \text{ A g}^{-1}$  for PC//pre-Li-Graphite and PC//pre-K-Graphite PICs.

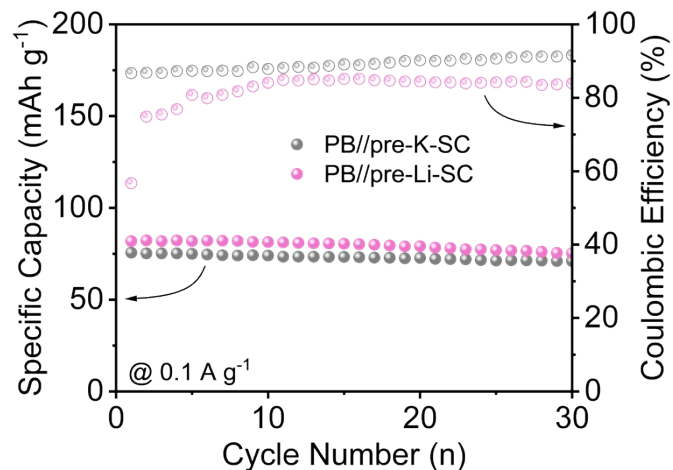

**Fig. S19** The comparison of long-term cycling performance and corresponding coulombic efficiencies at  $0.1 \text{ A g}^{-1}$  of PB//pre-Li-SC and PB//pre-K-SC PIBs.

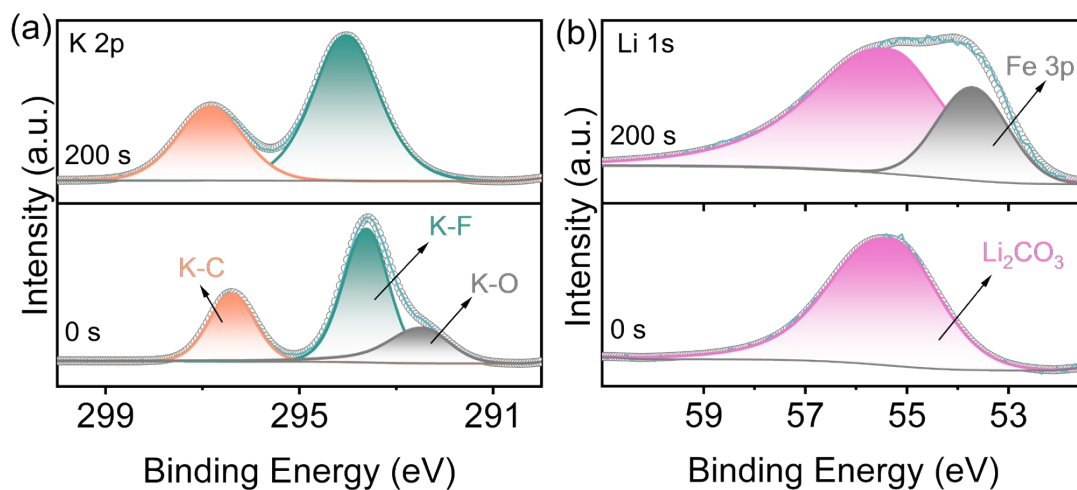

**Fig. S20** XPS spectra c-PB electrode before and after sputtered 200 s: (a) K 2p and (b) Li 1s.

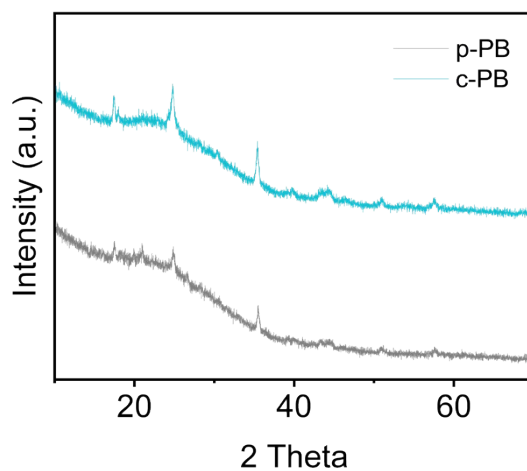

**Fig. S21** XRD patterns of p-PB and c-PB electrode (after three cycles in PB//pre-Li-SC full-cell at  $0.1 \text{ A g}^{-1}$ ).

**Table S1.** ICP results of pre-Li-SC/K and pre-Li-SC/PC.

| samples | Parametric   | Instrument readings (mg/L) | Measured elements | Content (mg/L) | K/Li molar ratio |
|---------|--------------|----------------------------|-------------------|----------------|------------------|
| 1       | pre-Li-SC/K  | 9.9686                     | K                 | 199.4          | 2.05             |
|         | half cells   | 0.8632                     | Li                | 17.3           |                  |
| 2       | pre-Li-SC/PC | 10.642                     | K                 | 212.8          | 2.16             |
|         | PICs         | 0.8763                     | Li                | 17.5           |                  |
